# Supplementary material for: Evaluation of whole genome amplification and bioinformatic methods for the characterization of Leishmania genomes at a single cell level
Source: PubMed Central journal article supplement (PMC7490275; doi:10.1038/s41598-020-71882-2), 2020-09-14
Supplement: 41598_2020_71882_MOESM4_ESM.pdf [file 41598_2020_71882_MOESM4_ESM.pdf]

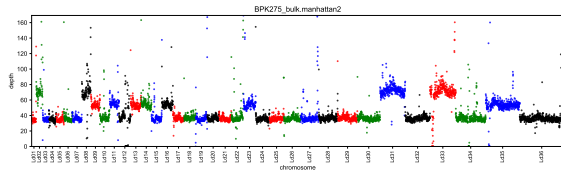

(A) BPk275\_bulk

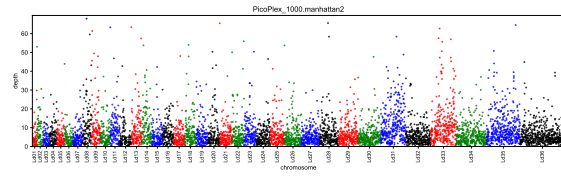

(B) PicoPlex\_1000

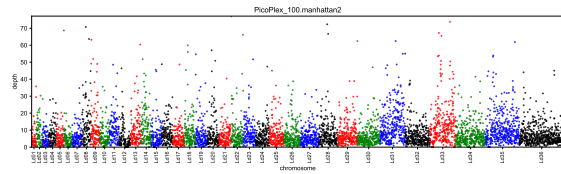

(C) PicoPlex\_100

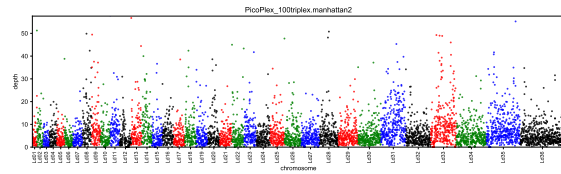

(D) PicoPlex\_100triplex

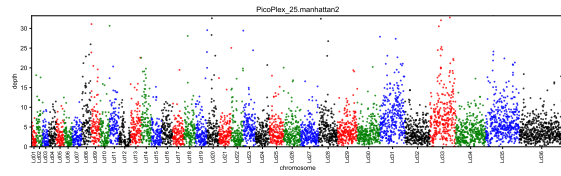

(E) PicoPlex\_25

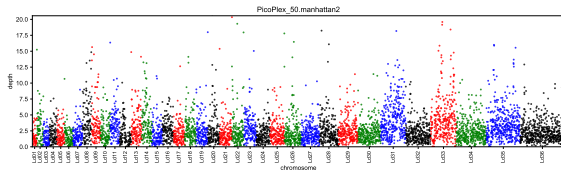

(F) PicoPlex\_50

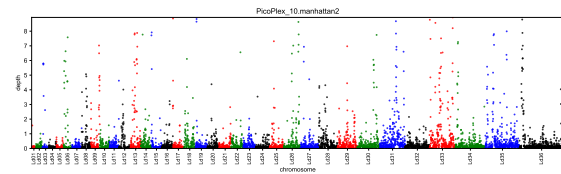

(G) PicoPlex\_10

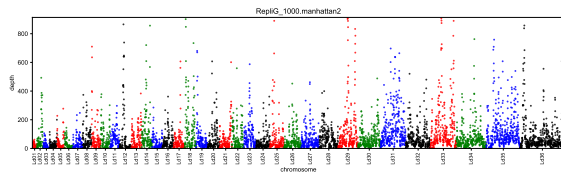

(H) RepliG\_1000

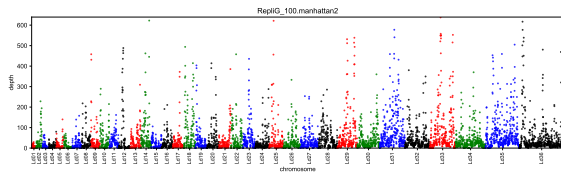

(I) RepliG\_100

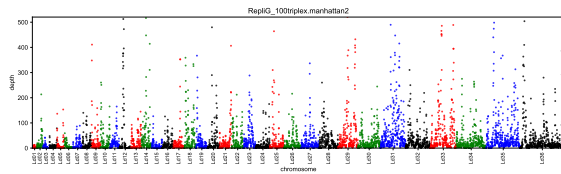

(J) RepliG\_100triplex

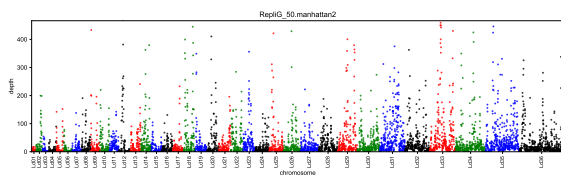

(K) RepliG\_50

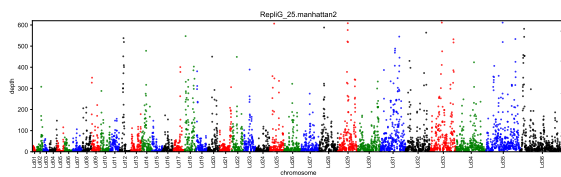

(L) RepliG\_25

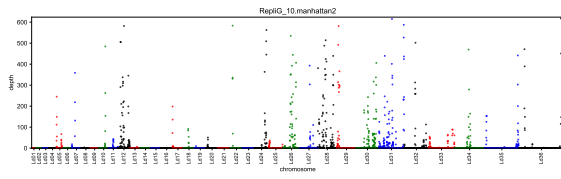

(A) RepliG\_10
