# Supplementary material for: Evaluation of whole genome amplification and bioinformatic methods for the characterization of Leishmania genomes at a single cell level
Source: PubMed Central journal article supplement (PMC7490275; doi:10.1038/s41598-020-71882-2), 2020-09-14
Supplement: 41598_2020_71882_MOESM6_ESM.pdf [file 41598_2020_71882_MOESM6_ESM.pdf]

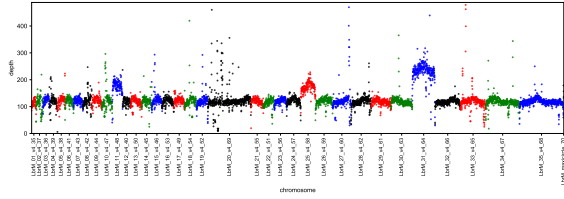

(A) PER094b\_bulk

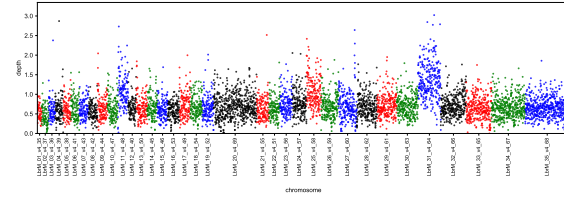

(B) PER094b\_sc17

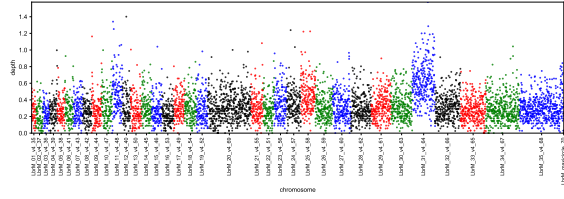

(C) PER094b\_sc7

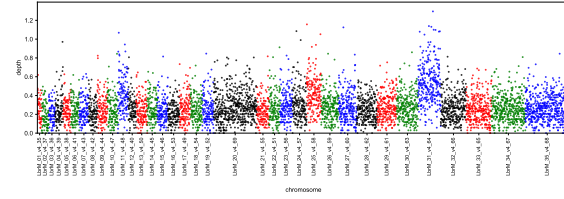

(D) PER094b\_sc1

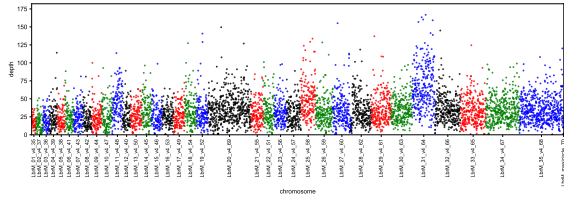

(E) PER094b\_sc15

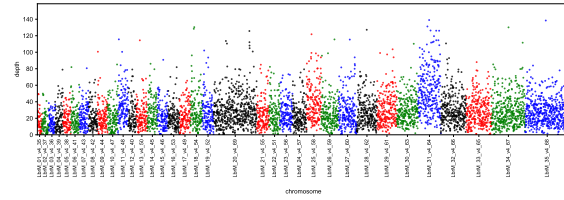

(F) PER094b\_sc13

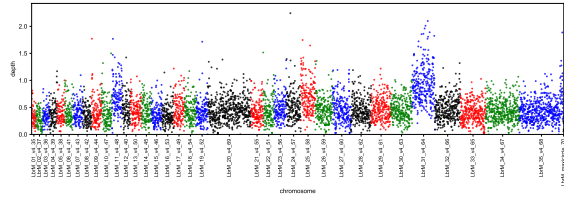

(G) PER094b\_sc12

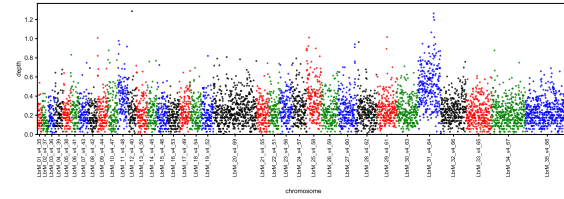

(H) PER094b\_sc19

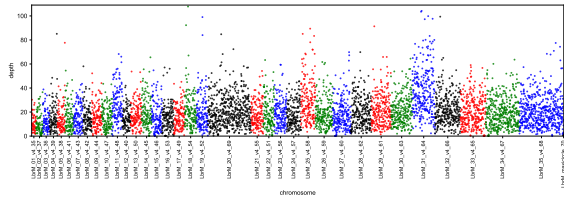

(I) PER094b\_sc16

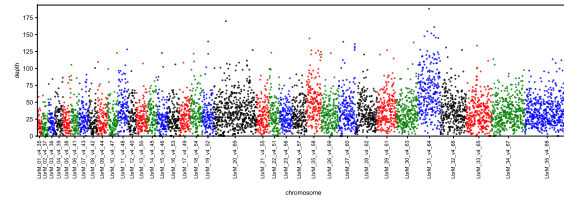

(J) PER094b\_sc20

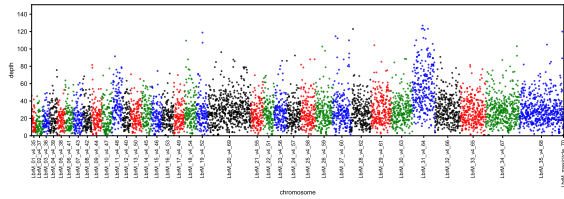

(K) PER094b\_sc9

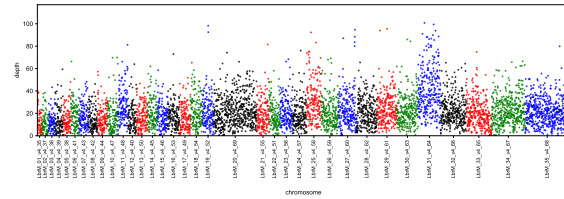

(L) PER094b\_sc5

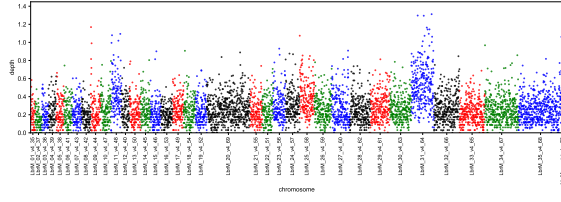

(A) PER094b\_sc3

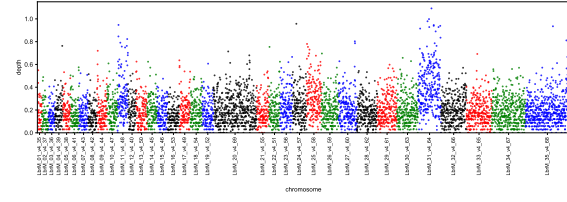

(B) PER094b\_sc4

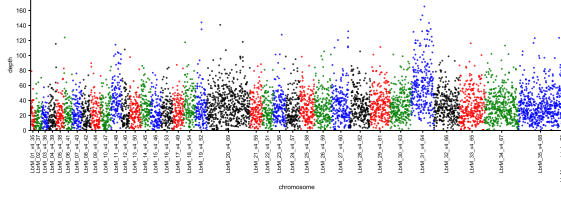

(C) PER094b\_sc2

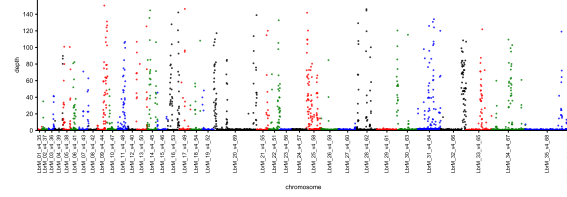

(D) PER094b\_sc22

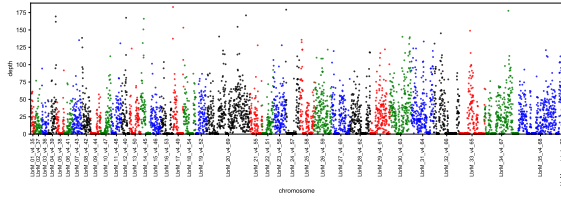

(E) PER094b\_sc8

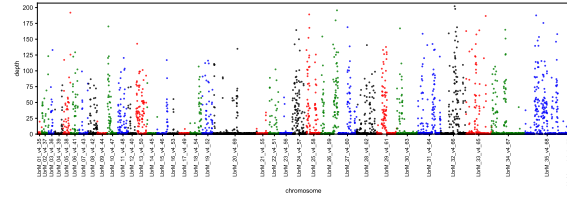

(F) PER094b\_sc10

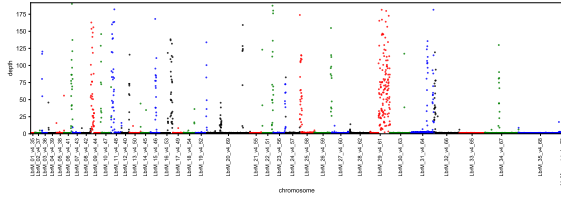

(G) PER094b\_sc18

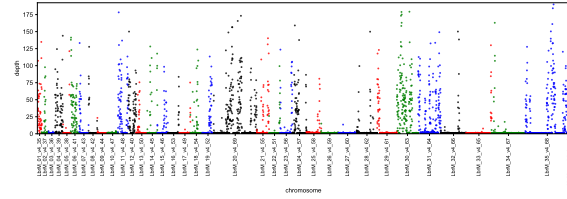

(H) PER094b\_sc6

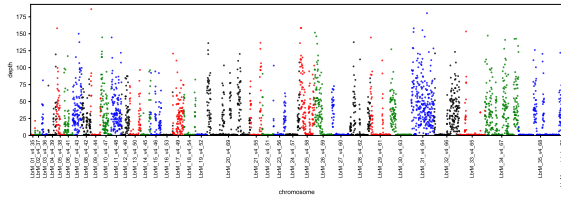

(I) PER094b\_sc14

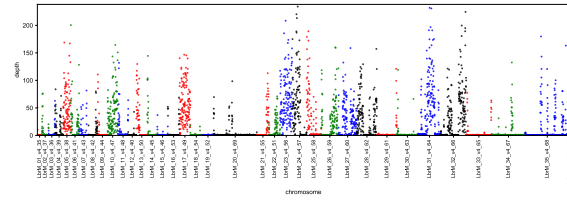

(J) PER094b\_sc11

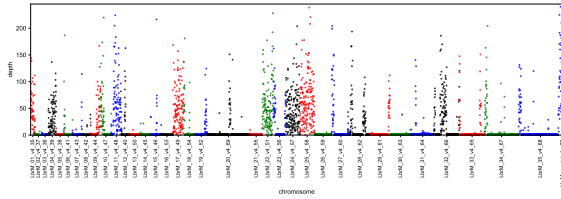

(K) PER094b\_sc21
