# Supplementary material for: Evaluation of whole genome amplification and bioinformatic methods for the characterization of Leishmania genomes at a single cell level
Source: PubMed Central journal article supplement (PMC7490275; doi:10.1038/s41598-020-71882-2), 2020-09-14
Supplement: 41598_2020_71882_MOESM7_ESM.pdf [file 41598_2020_71882_MOESM7_ESM.pdf]

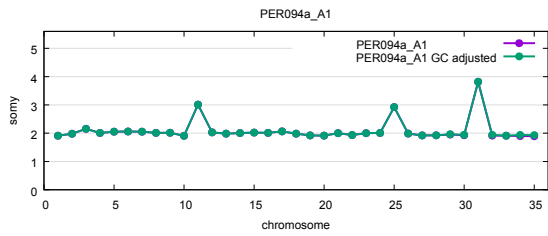

(A) PER094a\_bulk

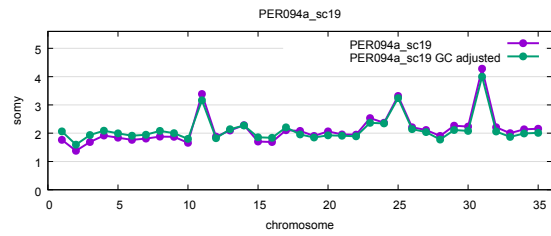

(B) PER094a\_sc19

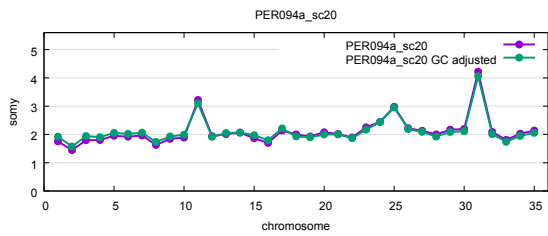

(C) PER094a\_sc20

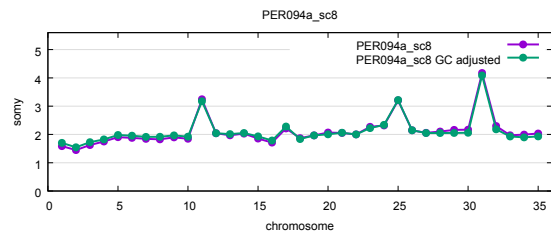

(D) PER094a\_sc8

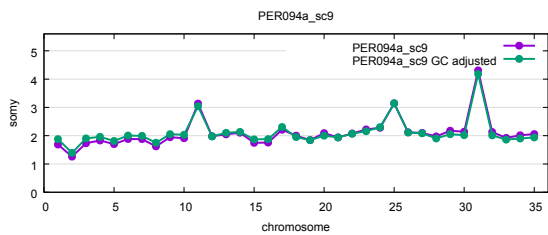

(E) PER094a\_sc9

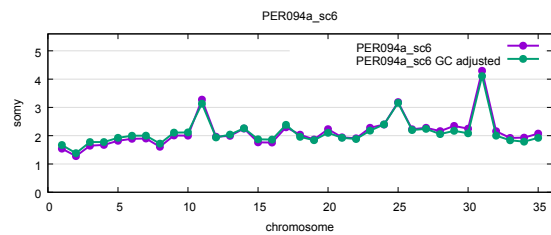

(F) PER094a\_sc6

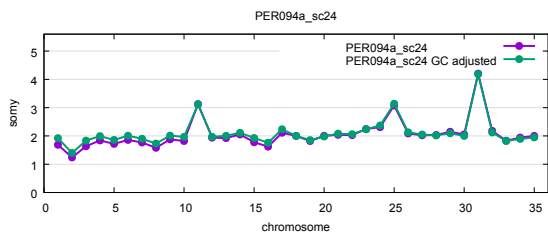

(G) PER094a\_sc24

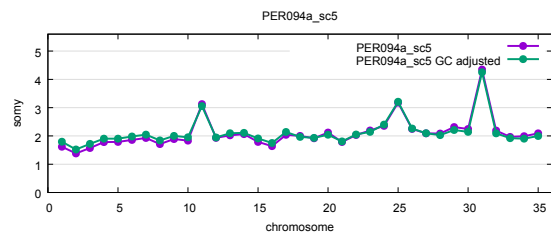

(H) PER094a\_sc5

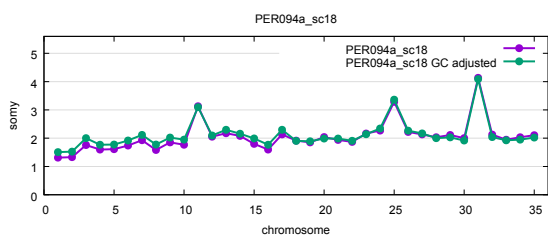

(I) PER094a\_sc18

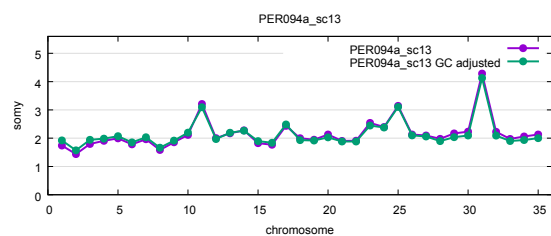

(J) PER094a\_sc13

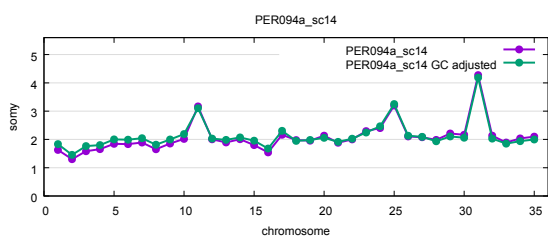

(K) PER094a\_sc14

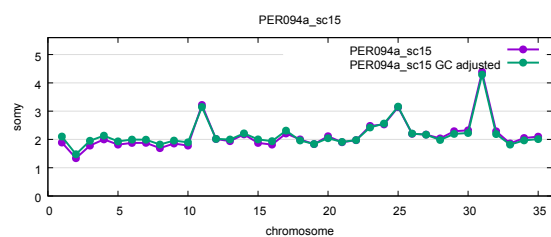

(L) PER094a\_sc15

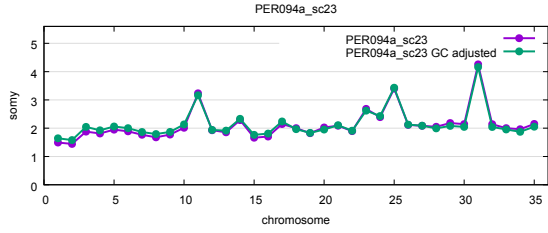

(A) PER094a\_sc23

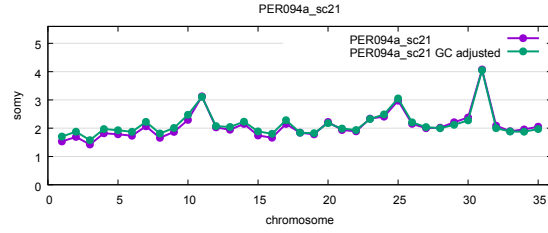

(B) PER094a\_sc21

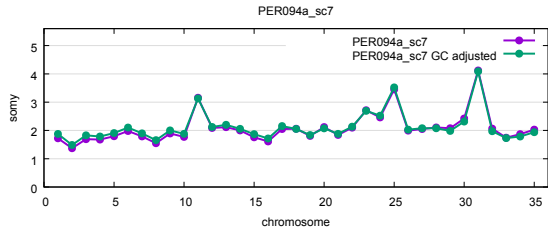

(C) PER094a\_sc7

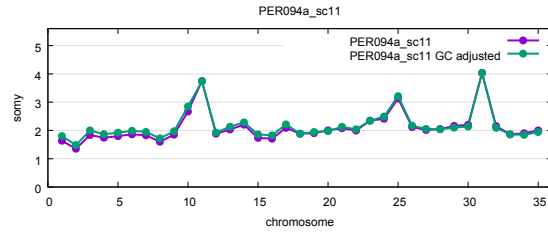

(D) PER094a\_sc11

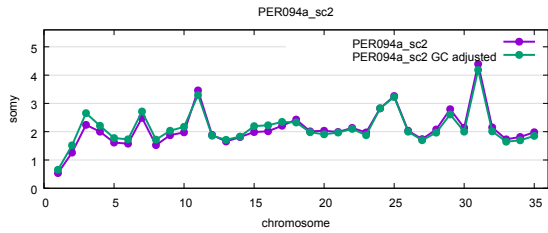

(E) PER094a\_sc2

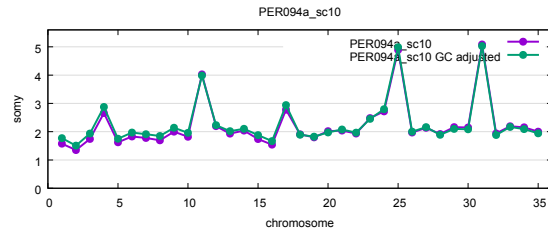

(F) PER094a\_sc10

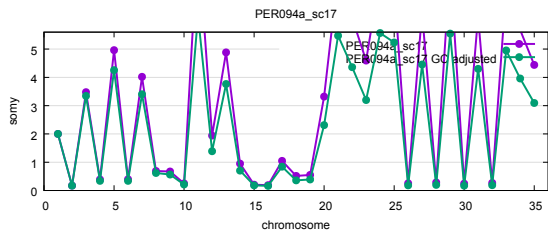

(G) PER094a\_sc17

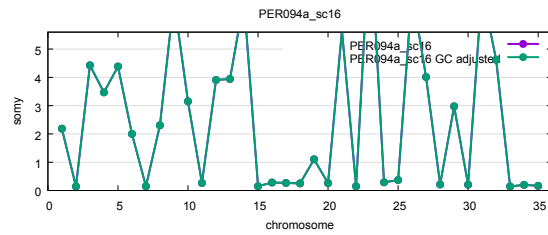

(H) PER094a\_sc16

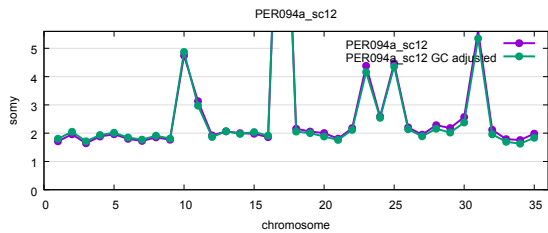

(I) PER094a\_sc12

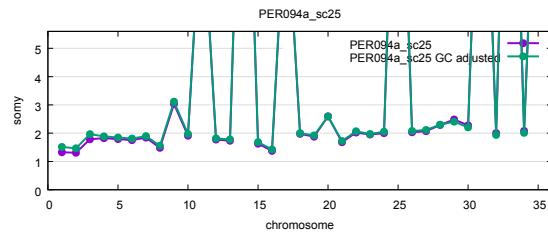

(J) PER094a\_sc25

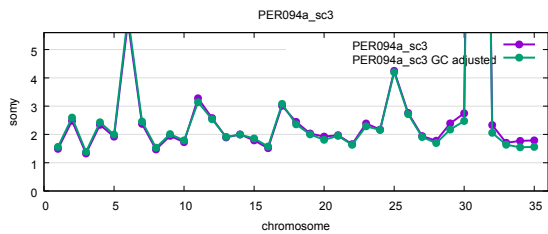

(K) PER094a\_sc3

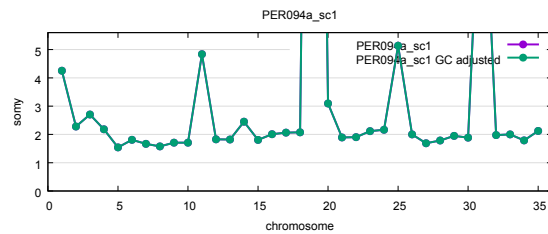

(L) PER094a\_sc1

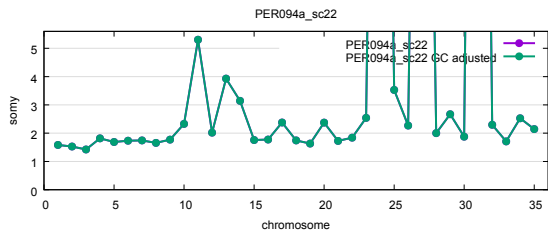

(A) PER094a\_sc22

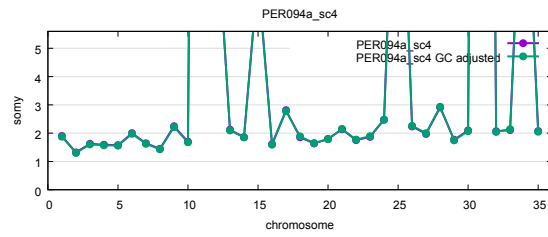

(B) PER094a\_sc4
